# Supplementary material for: A computational scheme of pKa values based on the three-dimensional reference interaction site model self-consistent field theory coupled with the linear fitting correction scheme
Source: Royal Society of Chemistry journal article supplement (doi:10.1039/c8cp04354j), 2018-01-01
Supplement: c8cp04354j1.pdf [file c8cp04354j1.pdf]

## Supporting Information:

# A computational scheme of $pK_a$ values based on the three-dimensional reference interaction site model self-consistent field theory coupled with the linear fitting correction scheme

*Ryo Fujiki*<sup>1</sup>, *Yukako Kasai*<sup>1</sup>, *Yuki Seno*<sup>1</sup>, *Toru Matsui*<sup>2</sup>, *Yasuteru Shigeta*<sup>3</sup>, *Norio Yoshida*<sup>\*1</sup>, *Haruyuki Nakano*<sup>1</sup>

1. Department of Chemistry, Graduate School of Science, Kyushu University, 744, Motoooka, Nishiku, Fukuoka, 819-0395 Japan

2. Department of Chemistry, Graduate School of Pure and Applied Sciences, University of Tsukuba, 1-1-1 Tennodai, Tsukuba, Ibaraki, 305-8577 Japan

3. Center for Computational Sciences, University of Tsukuba, 1-1-1 Tennodai, Tsukuba, Ibaraki, 305-8577 Japan

Table S1(1). Training set molecules for the LFC parameter fitting and those experimental  $pK_a$  values.

| Carboxyl | Molecule                                | $pK_a$  | Ref. | Amine | Molecule                                                        | $pK_a$                                                                       | Ref.                                                           |       |
|----------|-----------------------------------------|---------|------|-------|-----------------------------------------------------------------|------------------------------------------------------------------------------|----------------------------------------------------------------|-------|
|          |                                         | CHOCOOH | 3.32 |       | 1                                                               |                                                                              | Ph(CH <sub>2</sub> ) <sub>2</sub> NH <sub>3</sub> <sup>+</sup> | 9.83  |
|          | trans- CH <sub>3</sub> CH=CHCOOH        | 4.69    |      |       |                                                                 | PhCH <sub>2</sub> NH <sub>3</sub> <sup>+</sup>                               | 9.34                                                           |       |
|          | Ph(OH) <sub>2</sub> COOH                | 4.48    | 2    |       | PhNH <sub>3</sub> <sup>+</sup>                                  | 4.58                                                                         |                                                                |       |
|          | H <sub>2</sub> C=CHCH <sub>2</sub> COOH | 4.42    |      |       |                                                                 | CH <sub>3</sub> (CH <sub>2</sub> ) <sub>3</sub> NH <sub>3</sub> <sup>+</sup> | 10.58                                                          |       |
|          | (CH(OH)COOH) <sub>2</sub>               | 1.14    |      |       |                                                                 | CH <sub>3</sub> CH <sub>2</sub> NH <sub>3</sub> <sup>+</sup>                 | 10.67                                                          |       |
|          | CHOHCH <sub>3</sub> COOH                | 3.86    |      |       |                                                                 | HO(CH <sub>2</sub> ) <sub>2</sub> NH <sub>3</sub> <sup>+</sup>               | 9.50                                                           |       |
|          | CH <sub>3</sub> COCH <sub>2</sub> COOH  | 3.58    |      |       |                                                                 | HONH <sub>3</sub> <sup>+</sup>                                               | 5.96                                                           |       |
|          | CH <sub>3</sub> COCOOH                  | 2.50    |      |       |                                                                 | NH <sub>4</sub> <sup>+</sup>                                                 | 9.21                                                           |       |
|          | CHCl <sub>2</sub> COOH                  | 1.29    | 3    |       | H <sub>2</sub> C=CHCH <sub>2</sub> NH <sub>3</sub> <sup>+</sup> | 9.49                                                                         | 4                                                              |       |
|          | CH <sub>2</sub> FCOOH                   | 2.66    |      |       |                                                                 | CH <sub>3</sub> (CH <sub>2</sub> ) <sub>2</sub> NH <sub>3</sub> <sup>+</sup> |                                                                | 10.53 |
|          | NO <sub>2</sub> CH <sub>2</sub> COOH    | 1.68    |      |       |                                                                 | Cyclohexylamine                                                              |                                                                | 10.64 |
|          | PhNO <sub>2</sub> COOH                  | 2.45    | 4    |       | Cyclohexylmethyl amine                                          | 10.49                                                                        |                                                                |       |
|          |                                         |         |      |       | Isopropylamine                                                  | 10.63                                                                        |                                                                |       |
|          |                                         |         |      |       | Methoxyamine                                                    | 4.60                                                                         |                                                                |       |
|          |                                         |         |      |       | $\gamma$ -Phenylpropyl amine                                    | 10.20                                                                        |                                                                |       |
|          |                                         |         |      |       | neo-Pentylamine                                                 | 10.21                                                                        |                                                                |       |
|          |                                         |         |      |       | sec-Butylamine                                                  | 10.56                                                                        |                                                                |       |

Table S1(2). Training set molecules for the LFC parameter fitting and those experimental  $pK_a$  values.

| Imidazole | Molecule                                | $pK_a$ | Ref. | Thiol | Molecule             | $pK_a$                    | Ref.  |   |
|-----------|-----------------------------------------|--------|------|-------|----------------------|---------------------------|-------|---|
|           | 2-Methyl-4-hydroxy-aminobenzimidazole   | 6.65   | 6    |       | $C_2H_5OCH_2CH_2SH$  | 9.38                      | 7     |   |
|           | 2-Methylbenzimidazole                   | 6.10   |      |       | $C_2H_5OCOCH_2SH$    | 7.95                      |       |   |
|           | 2-Methylimidazole                       | 7.75   |      |       | $C_6H_5CH_2SH$       | 9.43                      |       |   |
|           | 4-Hydroxy-6-aminobenzimidazole          | 5.90   |      |       | $CH_2=CHCH_2SH$      | 9.96                      |       |   |
|           | 4-Hydroxybenzimidazole                  | 5.30   |      |       | $HOCH_2CHOHCH_2SH$   | 9.51                      |       |   |
|           | 4-Methoxybenzimidazole                  | 5.10   |      |       | $n-C_3H_7SH$         | 10.65                     |       |   |
|           | 4-Nitroimidazole                        | 1.50   |      |       | $n-C_4H_9SH$         | 10.66                     |       |   |
|           | 6-Nitrobenzimidazole                    | 3.05   |      |       | $t-C_3H_{11}SH$      | 11.21                     | 8     |   |
|           | Benzimidazole                           | 5.40   |      |       | 2-Mercaptoethanol    | 9.50                      |       |   |
|           | Imidazole                               | 6.95   |      |       | 2-Mercaptoethylamine | 8.60                      |       |   |
|           | 2-Methyl-4-hydroxy-6-nitrobenzimidazole | 3.90   |      |       |                      | Thioglycolic acid         | 10.31 | 9 |
|           | 4-Hydroxy-6-nitrobenzimidazole          | 3.05   |      |       |                      | Thiophenol                | 7.8   |   |
|           | 4-(2-4-dihydroxyphenyl)-imidazole       | 6.45   |      |       |                      | <i>o</i> -Aminothiophenol | 6.59  |   |
|           | 4-Methyl-imidazole                      | 7.45   |      |       |                      | 3-Mercaptopropionicacid   | 10.27 |   |
|           | 6-Aminobenzimidazole                    | 6.00   |      |       |                      |                           |       |   |
|           | Histamine                               | 6.00   |      |       |                      |                           |       |   |

Table S1(3). Training set molecules for the LFC parameter fitting and those experimental  $pK_a$  values.

| Alcohol | Molecule                    | $pK_a$                 | Ref.  | Phenol                         | Molecule                      | $pK_a$ | Ref.                         |
|---------|-----------------------------|------------------------|-------|--------------------------------|-------------------------------|--------|------------------------------|
|         |                             | <chem>CCl3CH2OH</chem> | 11.80 |                                | 10                            |        | <chem>2Cl-4NO2-phenol</chem> |
|         | <chem>CHF2CF2CH2OH</chem>   | 11.34                  |       | <chem>C3H5CH2O2C-phenol</chem> |                               | 8.41   | 14                           |
|         | <chem>CH2=CHCH2OH</chem>    | 15.10                  |       | <chem>m-CH3CO-phenol</chem>    |                               | 9.19   |                              |
|         | <chem>CH3CH2OH</chem>       | 15.90                  | 11    | <chem>m-CH3O-phenol</chem>     | 9.65                          |        |                              |
|         | <chem>CH3OCH2CH2OH</chem>   | 14.80                  |       |                                | <chem>m-F-phenol</chem>       | 9.28   |                              |
|         | <chem>CH3OH</chem>          | 15.54                  |       |                                | <chem>m-HOCH2-phenol</chem>   | 9.83   |                              |
|         | <chem>CHCCH2OH</chem>       | 13.55                  |       |                                | <chem>m-NH2phenol</chem>      | 9.87   |                              |
|         | <chem>CHCl2CH2OH</chem>     | 12.89                  |       |                                | <chem>o-OCH-phenol</chem>     | 6.79   |                              |
|         | <chem>HOCH2CF2CH2OH</chem>  | 11.00                  |       |                                | <chem>p-Br-phenol</chem>      | 9.34   |                              |
|         | <chem>CH3OCH2OH</chem>      | 14.80                  |       |                                | <chem>p-C2H5O2C-phenol</chem> | 8.50   |                              |
|         | <chem>C(CH2OH)4</chem>      | 14.10                  |       |                                | <chem>p-C6H5-phenol</chem>    | 9.51   |                              |
|         | <chem>HOCH2CHOHCH2OH</chem> | 14.40                  |       |                                | <chem>p-CH3O2C-phenol</chem>  | 8.47   |                              |
|         | <chem>C2H5OH</chem>         | 16.00                  |       |                                | <chem>p-CH3S-phenol</chem>    | 9.53   |                              |
|         | <chem>CF3CH2OH</chem>       | 12.37                  |       |                                | <chem>p-CH3SO2-phenol</chem>  | 7.83   |                              |
|         | <chem>HOCH2CH2OH</chem>     | 14.77                  |       | <chem>p-HO-phenol</chem>       | 9.96                          |        |                              |
|         | <chem>CF3C(CH3)2OH</chem>   | 11.60                  |       | <chem>p-NC-phenol</chem>       | 7.95                          |        |                              |
|         | <chem>CF3CH(OH)CH3</chem>   | 11.80                  | 12    | <chem>p-O2C-phenol</chem>      | 9.39                          |        |                              |
|         |                             |                        |       | <chem>p-(CH3)3N+phenol</chem>  | 8.00                          |        |                              |

Table S2. The fitted parameters, RMSE, correlation factor  $r$  and  $G(\text{H}^+)$  for LFC/PCM in each chemical group, using 6-31++G(d,p).

|           | $k^a$ | $C_0$   | $s$   | RMSE  | $r$   | $G(\text{H}^+)^b$ |
|-----------|-------|---------|-------|-------|-------|-------------------|
| Alcohol   | 0.238 | -61.002 | 0.325 | 1.115 | 0.733 | -255.9            |
| Amine     | 0.380 | -98.353 | 0.519 | 0.597 | 0.955 | -258.8            |
| Imidazole | 0.310 | -81.673 | 0.423 | 0.647 | 0.922 | -263.2            |
| Thiol     | 0.260 | -66.928 | 0.354 | 0.866 | 0.716 | -257.8            |
| Phenol    | 0.223 | -57.650 | 0.305 | 0.441 | 0.925 | -258.0            |
| Carboxyl  | 0.221 | -60.102 | 0.302 | 0.622 | 0.853 | -271.4            |
| Total     |       |         |       | 0.721 | 0.977 |                   |

<sup>a</sup> Unit of  $k$  is mol/kcal. <sup>b</sup> Unit of  $G(\text{H}^+)$  is kcal/mol.

Table S3. The comparison of the computed and experimental  $pK_a$  values for amino acids using the PCM.

| Amino acid            | Chemical group | $pK_a$    |             |                   |
|-----------------------|----------------|-----------|-------------|-------------------|
|                       |                | LFC/PCM   | direct PCM  | expt <sup>a</sup> |
| Asp                   | Carboxyl       | 1.97      | 27.51       | 3.86              |
| Cys                   | Thiol          | 7.10      | 31.10       | 8.33              |
| Glu                   | Carboxyl       | 4.25      | 35.08       | 4.25              |
| His(D/E) <sup>b</sup> | Imidazole      | 6.23/6.23 | 29.72/29.74 | 6.04              |
| Lys                   | Amine          | 12.02     | 34.96       | 10.53             |
| Tyr                   | Phenol         | 9.96      | 43.85       | 10.07             |

<sup>a</sup> Taken from ref. 15. <sup>b</sup> D and E denote the positions where protonation occurs, the delta and epsilon nitrogens, respectively.

## References

1. J.F.J. Dippy, S.R.C. Hughes, A. Rozanski, *J. Chem. Soc.* 1959, 2492-2498
2. R.M.C. Dawson, et al., *Data for Biochemical Research*, Oxford, Clarendon Press, 1959
3. J. March, et al, *Advanced Organic Chemistry*, 3rd Ed, 1985
4. H.C. Brown, et al., in E.A. Braude, and F.C. Nachod *Determination of Organic Structures by Physical Methods*, Academic Press, New York, 1955
5. H.K. Hall Jr., *J. Am. Chem. Soc.* 1957, **79**, 5441-5444
6. T.C. Bruice, G.L. Schmir, *J. Am. Chem. Soc.* 1958, **80**, 148-156
7. M.M. Kreevoy, et al. *J. Am. Chem. Soc.* 1960, **82**, 4899-4902.
8. J.T. Edsall, Wyman and Jeffries, *Biophysical Chemistry*, Academic Press, Inc., New York, 1958
9. J.P. Danehy, Noel, C.J. *J. Am. Chem. Soc.* 1960, **82**, 2511-2515
10. R.N. Haszeldine, *J. Chem. Soc.* 1953, 1748-1757
11. P. Ballinger, F.A. Long, *J. Am. Chem. Soc.* 1960, **82**, 795-798
12. P. Ballinger, F.A. Long, *J. Am. Chem. Soc.* 1959, **81**, 1050-1053
13. V.E. Bower, R.A. Robinson, *J. Phys. Chem.* 1960, **64**, 1078-1079
14. R. Williams, pK<sub>a</sub> data compiled by R. Williams. [Online accessed on]. <http://www.chem.wisc.edu/areas/organic/index-chem.htm>. 2011. [06/12/2018].
15. R. M. C. Dawson, D. C. Elliott, W. H. Elliott, K. M. Jones, *Data for Biochemical Research*. Clarendon Press Oxford: 1969; Vol. 316.
